# Supplementary material for: MIGRENE: The Toolbox for Microbial and Individualized GEMs, Reactobiome and Community Network Modelling
Source: MDPI journal article supplement (doi:10.3390/metabo14030132), 2024-02-21
Supplement: s1 [file s1]

## Supplementary note

### Calculation of reaction score (pseudocode)

```
INPUT referenceGEM
INPUT mspGene (binary  $n \times m$  matrix,  $n$ : number of genes;  $m$ : number of MSPs)
INPUT taxonomy ( $m \times r$  table,  $m$ : number of MSPs;  $r$ : number of taxonomy level i.e. from genus to phylum,
[ $m, r$ ]: taxonomy name)
reactionState= zeros (length(referenceGEM.rules),  $m$ )
FOR  $h = 1$  to  $m$ 
    vect= gene names (mspGene(:, $h$ )==1)
    FOR  $i=1$  to length(vect)
        index=find (vect $i$  in referenceGEM.rules)
        IF NOT empty (index) THEN reactionState(index, $i$ )=1 ENDIF
    ENDFOR
ENDFOR
% convert reaction state to reaction score
FOR  $i = 1$  to  $m$ 
    FOR  $j= 1$  to  $r$ 
        IF taxonomy ( $i, j$ ) != "unclassified" THEN
            index=find (taxonomy ( $i, j$ ) in taxonomy (:, $j$ ))
            state= reactionState (:,index)
            FOR  $k= 1$  to length(referenceGEM.rules)
                ScoreMatrix( $k, j$ ) = sum(state( $k, :$ )) /  $r$ ;
            ENDFOR
        ELSE
            ScoreMatrix(:, $j$ )=0
        ENDIF
    ENDFOR
    FOR  $k= 1$  to length(referenceGEM.rules)
        ScoreMatrix( $k, (r+1)$ ) = sum(ScoreMatrix ( $k, :$ )) /  $r$ ;
    ENDFOR
    reactionScore(:, $i$ )= ScoreMatrix( $k, (r+1)$ )
ENDFOR
FOR  $i = 1$  to length(referenceGEM.rules)
    IF empty (referenceGEM.rules( $i$ )) THEN
        reactionState( $i, :$ )=-1; reactionScore( $i, :$ )=-1
    ENDIF
ENDFOR
% Define threshold
FOR  $j= 1$  to  $r$ 
    threshold (1, $j$ )= MIN ScoreMatrix(1, $j$ )>0
ENDFOR

RETURN threshold
RETURN reactionScore
RETURN reactionState
```
